# Supplementary material for: Influence of socioeconomic status on the whole blood transcriptome in African Americans
Source: PLoS One. 2017 Dec 5;12(12):e0187290. doi: 10.1371/journal.pone.0187290 (PMC5716587; doi:10.1371/journal.pone.0187290)
Supplement: S2 Table — (XLSX) [file pone.0187290.s003.xlsx]

## Sheet: steelblue_MM_GS_DE
Genes in steeblue module	logFC	P.Value	P.Value (FDR)	Module Membership
FW340055	0.656792	1.31352e-06	0.000660217	0.904271
ANXA3	0.778001	1.81378e-06	0.000785746	0.808703
RNF24	0.622671	2.51796e-06	0.000904008	0.871692
STX3	0.570771	1.60904e-05	0.00295887	0.931153
CXCR1	0.613602	3.1891e-05	0.00461474	0.87491
PPP1R3B	0.548819	3.28649e-05	0.00467519	0.954124
DHRSX	0.577126	3.74985e-05	0.00509406	0.760177
LIMK2	0.522389	5.89544e-05	0.00674416	0.810027
AK127443	0.573645	5.90377e-05	0.00674416	0.894766
MXD1	0.660054	6.03573e-05	0.006792	0.918435
CLEC4E	0.580946	6.09168e-05	0.00680418	0.799878
CXCR2	0.641531	0.000100096	0.00992991	0.935453
FCGR3B	0.757114	0.000116062	0.0110766	0.886162
ALPK1	0.483681	0.000166678	0.0138859	0.922478
GK	0.489509	0.000258121	0.0183594	0.897096
AK026714	0.507819	0.000262717	0.0185987	0.909077
MXD3	0.522668	0.000295148	0.0197877	0.876431
NRBF2	0.458573	0.000316315	0.0205229	0.964036
KCNJ2	0.45836	0.000347444	0.021313	0.880924
PHF21A	0.428306	0.000417797	0.0243242	0.898114
GNG10	0.483784	0.000488058	0.0269576	0.927912
DKFZp451J181	0.486519	0.000626037	0.0311552	0.929498
PELI1	0.457393	0.000753277	0.0348997	0.942118
ARL11	0.420427	0.000771831	0.0353752	0.884878
IL1R1	0.546422	0.000771603	0.0353752	0.855457
MSL1	0.442949	0.000869755	0.0375789	0.860587
LRRK2	0.550206	0.000965419	0.0398147	0.910584
RALB	0.406427	0.000992395	0.0406639	0.900869
FCGR2A	0.504988	0.00102509	0.0413297	0.948384
TLR1	0.433022	0.00136684	0.0505162	0.972214
SLC9A8	0.39639	0.00144846	0.0520032	0.741703
DENND5A	0.391401	0.00162285	0.0570417	0.854387
FNDC3B	0.38556	0.00175849	0.0598563	0.836923
CSF2RB	0.442538	0.0020288	0.0660739	0.894321
IL1RAP	0.422705	0.00222909	0.0703188	0.894345
FPR2	0.397457	0.0024207	0.0741905	0.846504
MNDA	0.485939	0.00254443	0.0768225	0.939005
MOSPD2	0.369484	0.00258499	0.0770269	0.903235
CEP63	0.388352	0.00260152	0.0771087	0.90474
TLR4	0.427628	0.00268978	0.0782662	0.934496
P2RY13	0.391754	0.00285418	0.080439	0.938776
RNF149	0.426864	0.00292236	0.0810042	0.963812
NAMPT	0.597053	0.00299012	0.0818294	0.949947
B4GALT5	0.354898	0.0031415	0.0834298	0.778449
FPR1	0.429251	0.00337182	0.087061	0.834507
CLEC7A	0.378664	0.00371376	0.093333	0.876812
CTBS	0.372471	0.00383163	0.0948573	0.889681
C7orf53	0.493445	0.00388265	0.0958208	0.925957
FAM126B	0.409381	0.00428295	0.102679	0.899217
ARHGAP26	0.38527	0.00428525	0.102679	0.892318
PTGS2	0.391514	0.00475608	0.110164	0.823033
VNN2	0.43807	0.0049076	0.112807	0.846201
FAM129A	0.457757	0.00492981	0.113145	0.885423
IGSF6	0.339354	0.00512482	0.115684	0.878731
LYN	0.402127	0.00541002	0.119554	0.937963
ZCCHC6	0.369851	0.00556606	0.121639	0.901401
IL13RA1	0.344329	0.00576321	0.123618	0.855235
RFWD2	0.318536	0.00581155	0.124054	0.933
SDCBP	0.4004	0.00704764	0.139935	0.967505
LITAF	0.391802	0.0082499	0.155113	0.924358
N4BP1	0.304065	0.00937232	0.168342	0.860594
ZFYVE16	0.31772	0.00957859	0.169924	0.910452
SKAP2	0.310425	0.011909	0.19519	0.830048
SOD2	0.397928	0.0142696	0.213098	0.958308
CRK	0.28424	0.0146826	0.217057	0.923784
ZFP36L1	0.307586	0.0152222	0.222132	0.854601
SBF2	0.281336	0.0155336	0.224789	0.875355
MAPK14	0.298781	0.0184696	0.248886	0.832019
CYB5R4	0.273308	0.0190305	0.252607	0.940022
BC016015	0.373253	0.0193157	0.254155	0.926774
TET2	0.34567	0.0197894	0.257595	0.96954
HSD17B11	0.279162	0.0198429	0.257719	0.911984
ST8SIA4	0.299057	0.0200658	0.259052	0.851103
CFLAR	0.370524	0.0215788	0.267808	0.951511
HSDL2	0.283609	0.0216238	0.267925	0.819768
RAB33B	0.265693	0.0232897	0.278719	0.870873
SPOPL	0.276357	0.0262129	0.297045	0.913789
TOPORS	0.266483	0.0264536	0.297485	0.834823
EVI2B	0.313229	0.0267515	0.299248	0.893177
CD55	0.284674	0.0273774	0.302648	0.851043
CD46	0.287426	0.0288657	0.311077	0.885859
NEAT1	0.533691	0.0294151	0.314798	0.946281
ELF2	0.249112	0.0294476	0.314903	0.915909
RRM2B	0.247701	0.0326215	0.329124	0.903745
BACH1	0.301703	0.0338056	0.333391	0.90892
CCPG1	0.267867	0.0354595	0.341955	0.914014
RNF13	0.246901	0.0366631	0.347925	0.852216
TLE4	0.234307	0.0372047	0.350956	0.840492
SRGN	0.320462	0.0391798	0.359582	0.960022
ATF6	0.247175	0.0405256	0.36468	0.873703
PICALM	0.296662	0.043682	0.380961	0.901813
CD58	0.245708	0.0439853	0.381839	0.840516
LAMP2	0.252713	0.0455033	0.387832	0.945015
C12orf35	0.327762	0.0521409	0.41164	0.886614
RNF141	0.239059	0.0523995	0.412595	0.802797
LOC93622	-0.247388	0.0543268	0.419274	0.765858
RIT1	0.219846	0.0563205	0.425648	0.896884
H3F3B	0.310178	0.0611638	0.440258	0.965822
PTEN	0.265635	0.0630209	0.444014	0.927705
C9orf72	0.241179	0.0630063	0.444014	0.840482
C10orf46	0.207614	0.0650242	0.449977	0.890889
ITM2B	0.285133	0.0677746	0.458269	0.941406
CMTM6	0.238725	0.0690465	0.461299	0.935623
PHF20L1	0.208865	0.0714135	0.468594	0.902304
LPGAT1	0.220959	0.0775584	0.478325	0.7921
TLR8	0.222394	0.0895622	0.499264	0.893886
KBTBD2	0.187532	0.0916422	0.503924	0.901221
C5orf41	0.211239	0.092869	0.505367	0.889511
SP1	0.211801	0.0943375	0.507369	0.916267
BID	0.192224	0.0949379	0.508189	0.841304
MCL1	0.27626	0.0976112	0.511602	0.934395
FAF1	-0.179833	0.11294	0.534693	0.751887
STK38L	0.179051	0.116507	0.538404	0.766152
DYNC1LI1	0.181376	0.121768	0.542917	0.799348
IFNAR1	0.194772	0.122051	0.543756	0.876142
UHRF1BP1L	0.174124	0.129614	0.554768	0.895192
HBP1	0.16923	0.130819	0.555044	0.91351
LBR	0.187989	0.132257	0.558158	0.764752
BRWD3	0.180689	0.139468	0.568362	0.909375
PIAS1	0.160631	0.158337	0.588522	0.873819
YIPF4	0.161496	0.160445	0.591526	0.807887
RAB18	0.158686	0.162035	0.593166	0.738507
CDC42SE1	0.184251	0.177839	0.604772	0.846813
CCDC126	0.165624	0.186028	0.613203	0.760472
MAP3K2	0.173723	0.188672	0.615713	0.827978
PAK2	0.16809	0.191357	0.61696	0.851726
RB1CC1	0.14505	0.210034	0.629078	0.906137
MARCH7	0.151139	0.217473	0.632556	0.880164
PPM1D	0.139857	0.219408	0.633197	0.838103
PPP3CA	0.128578	0.242168	0.652546	0.757535
IQGAP1	0.181198	0.248908	0.657026	0.882411
ZNF230	0.139047	0.256868	0.661087	0.851108
GSK3B	0.118943	0.282503	0.677999	0.812538
HIPK3	0.12496	0.336925	0.713687	0.870727
MKLN1	0.117341	0.342626	0.717341	0.816054
KAT6A	0.118397	0.353621	0.724884	0.856159
PTPN12	0.113312	0.355067	0.724991	0.836406
AGTPBP1	0.116612	0.363272	0.729856	0.811221
CTAGE5	0.0991357	0.377689	0.737079	0.826121
MDM2	0.108057	0.381056	0.739314	0.844353
PPP1R15B	0.0833569	0.45843	0.784021	0.877679
